# Supplementary material
Source: PubMed Central journal article supplement (PMC3419860)
Supplement: Supp_Fig.pdf [file Supp_Fig.pdf]

## Supplementary Data

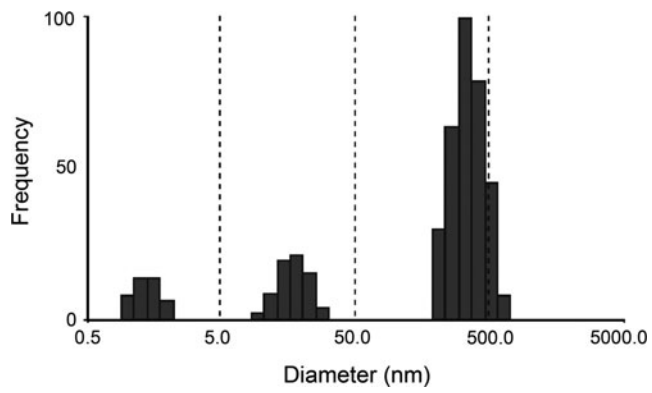

**SUPPLEMENTARY FIG. S1.** Representative dynamic light-scattering data for PDMS particles in an aqueous solution. PDMS, poly(dimethylsiloxane).
